# Supplementary material for: The microbiome of cryospheric ecosystems
Source: PubMed Central journal article supplement (PMC9163120; doi:10.1038/s41467-022-30816-4), 2022-06-02
Supplement: 41467_2022_30816_MOESM1_ESM.pdf [file 41467_2022_30816_MOESM1_ESM.pdf]

# Supplementary information:

## The microbiome of cryospheric ecosystems

Massimo Bourquin<sup>1,\*</sup>, <sup>§</sup>, Susheel Bhanu Busi<sup>2,\*</sup>, Stilianos Fodelianakis<sup>1</sup>, Hannes Peter<sup>1</sup>, Alex Washburne<sup>3</sup>, Tyler J. Kohler<sup>1</sup>, Leila Ezzat<sup>1</sup>, Grégoire Michoud<sup>1</sup>, Paul Wilmes<sup>2</sup>, Tom J. Battin<sup>1,§</sup>

<sup>1</sup> River Ecosystems Laboratory, Centre for Alpine and Polar Environmental Research (ALPOLE), École Polytechnique Fédérale de Lausanne, EPFL, Switzerland

<sup>2</sup> Luxembourg Centre for Systems Biomedicine, University of Luxembourg, University of Luxembourg, Campus Belval, 7, avenue des Hauts-Fourneaux, L-4362 Esch-sur-Alzette, Luxembourg

<sup>3</sup> Selva Analytics LLC, Bozeman, MT, 59718, USA

<sup>4</sup> Department of Life Sciences and Medicine, Faculty of Science, Technology and Medicine, University of Luxembourg, 7, avenue des Hauts-Fourneaux, L-4362 Esch-sur-Alzette, Luxembourg

\*Equal contributions

<sup>§</sup>Correspondence to: MB (massimo.bourquin@epfl.ch) and TJB (tom.battin@epfl.ch)

### Content:

- Page 2-5: Supplementary Figures 1-4

- Page 6-14: Supplementary Tables 1-8

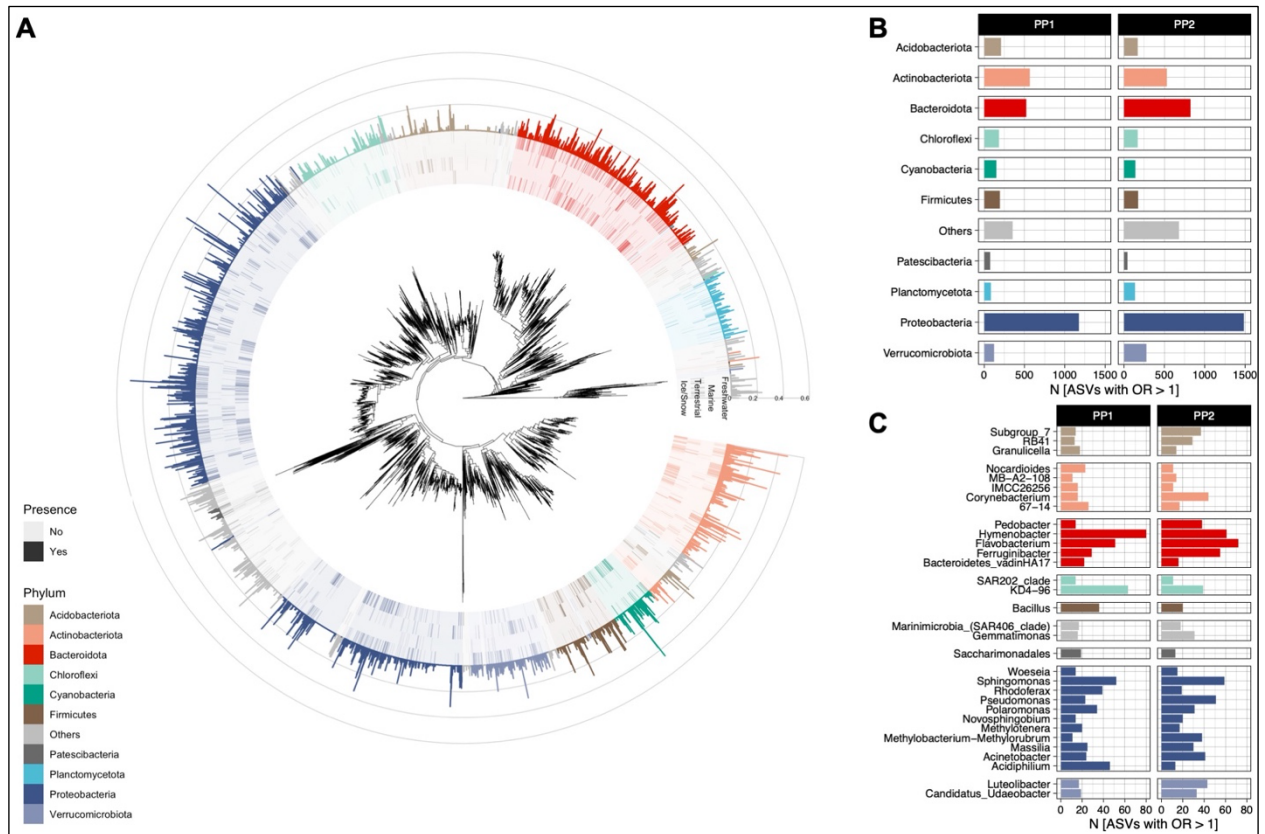

20

21 **Supplementary Figure 1. A)** Phylogenetic tree based on the abundant ASVs (relative abundance  
 22 > 0.5%) found in PP2, demonstrating the cryosphere microbiome diversity across the bacterial tree  
 23 of life. The highlighted colors represent the ASVs detected in cryospheric ecosystems, and the  
 24 barplot represents the coefficient for the logistic classification analysis. The number of ASVs at  
 25 **B)** the phylum-level, and **C)** genus-level taxonomy with an odds-ratio greater than 1 in the logistic  
 26 classification is shown for PP1 and PP2. Only taxa with the highest numbers are shown.

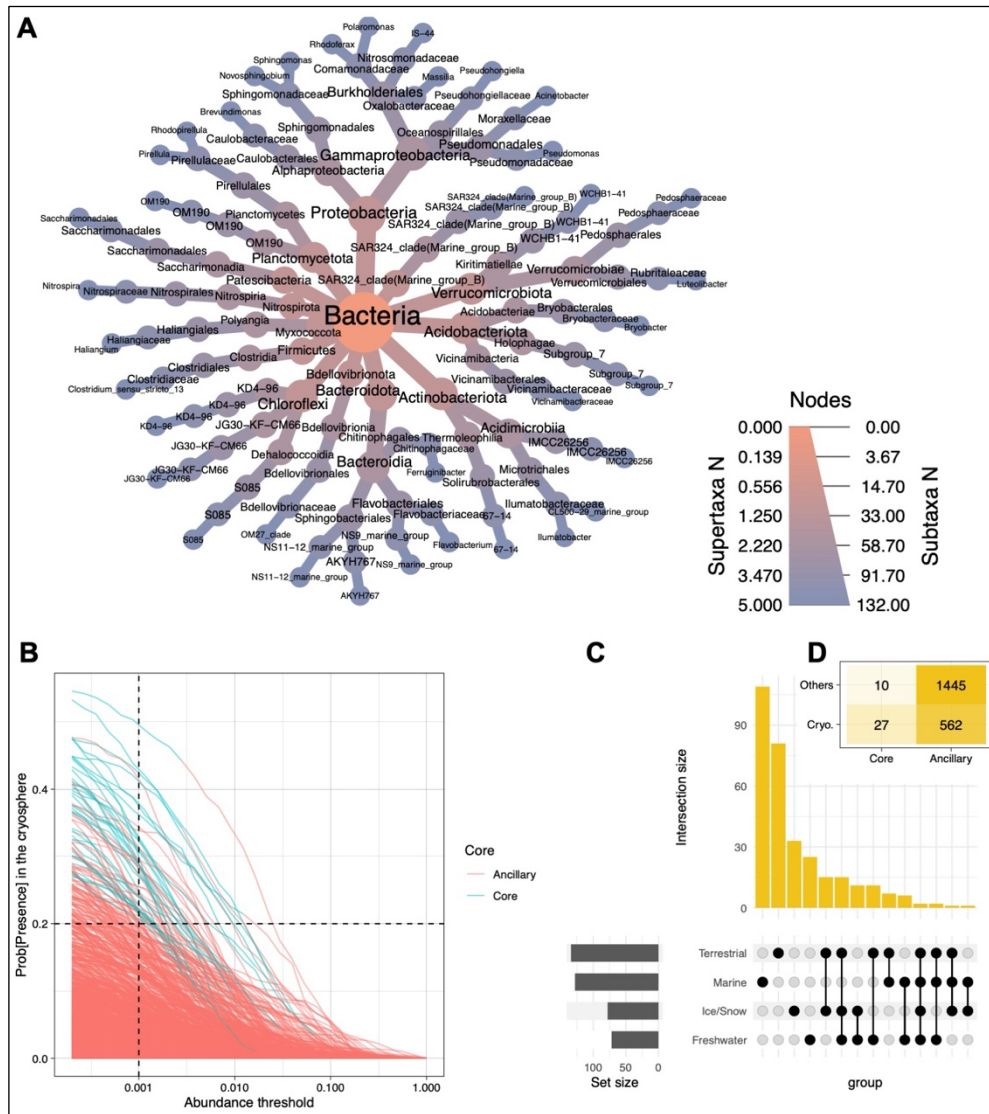

27

28 **Supplementary Figure 2.** A) Heat-tree showing the taxonomic classification of the 37 bacterial  
 29 genera representing the core microbiome of the cryosphere (out of the 2044 total bacterial genera).  
 30 They represent all bacterial genera with a probability of presence of 20% (calculated in the  
 31 binomial model analysis, abundance threshold of 0.1%) in the cryosphere, and present in all four  
 32 ecosystem types. B) Line graphs depicting the probability of presence of a given bacterial genus  
 33 in the cryosphere and their respective abundance, to identify the 'core' (blue) and 'ancillary' (red)  
 34 genera. The dashed lines represent the chosen thresholds for the core microbiome definition. C)  
 35 Upset plot showing the overlap across the ecosystem types core microbiome, defined at the genus-  
 36 level, with a prevalence of 20% at an abundance threshold of 0.1% relative abundance. D) Heat  
 37 plot showing the number of genera per group, highlighting the large overlap between the core  
 38 microbiome and the cryospheric genera.

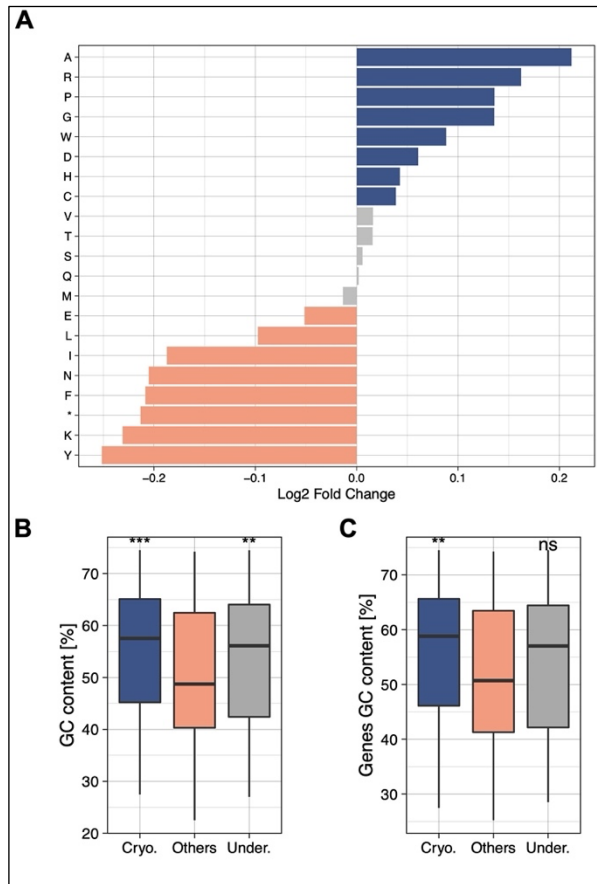

39

40 **Supplementary Figure 3. A)** The enriched abundance of aminoacids in the cryosphere (blue; 41 positive fold change) compared to those found in the non-cryospheric ecosystems are depicted. 42 The “\*” represents stop codons. **B)** The overall GC% of the genomes belonging to the cryospheric, 43 others and underrepresented genera are depicted (n = 660 total bacterial genera, 197 of which are 44 cryospheric genera, 198 are underrepresented in the cryosphere). **C)** The GC% of the genes 45 predicted in the genomes belonging to the cryospheric, others and underrepresented genera are 46 depicted. The median, 25% and 75% quartiles are represented in the boxplots. Two-sided 47 Wilcoxon tests were performed to assess significance in panels B and C; the Holm method was 48 used to correct for multiple testing (\*\*\*: 0-0.001, \*\*: 0.001-0.01). Boxplots depict the median 49 and the 25<sup>th</sup> and 75<sup>th</sup> quartiles, whiskers extend to values within 1.5 times the interquartile range, 50 and the remaining points are outliers. Exact p-values and medians are listed in Supplementary 51 Table 6.

52

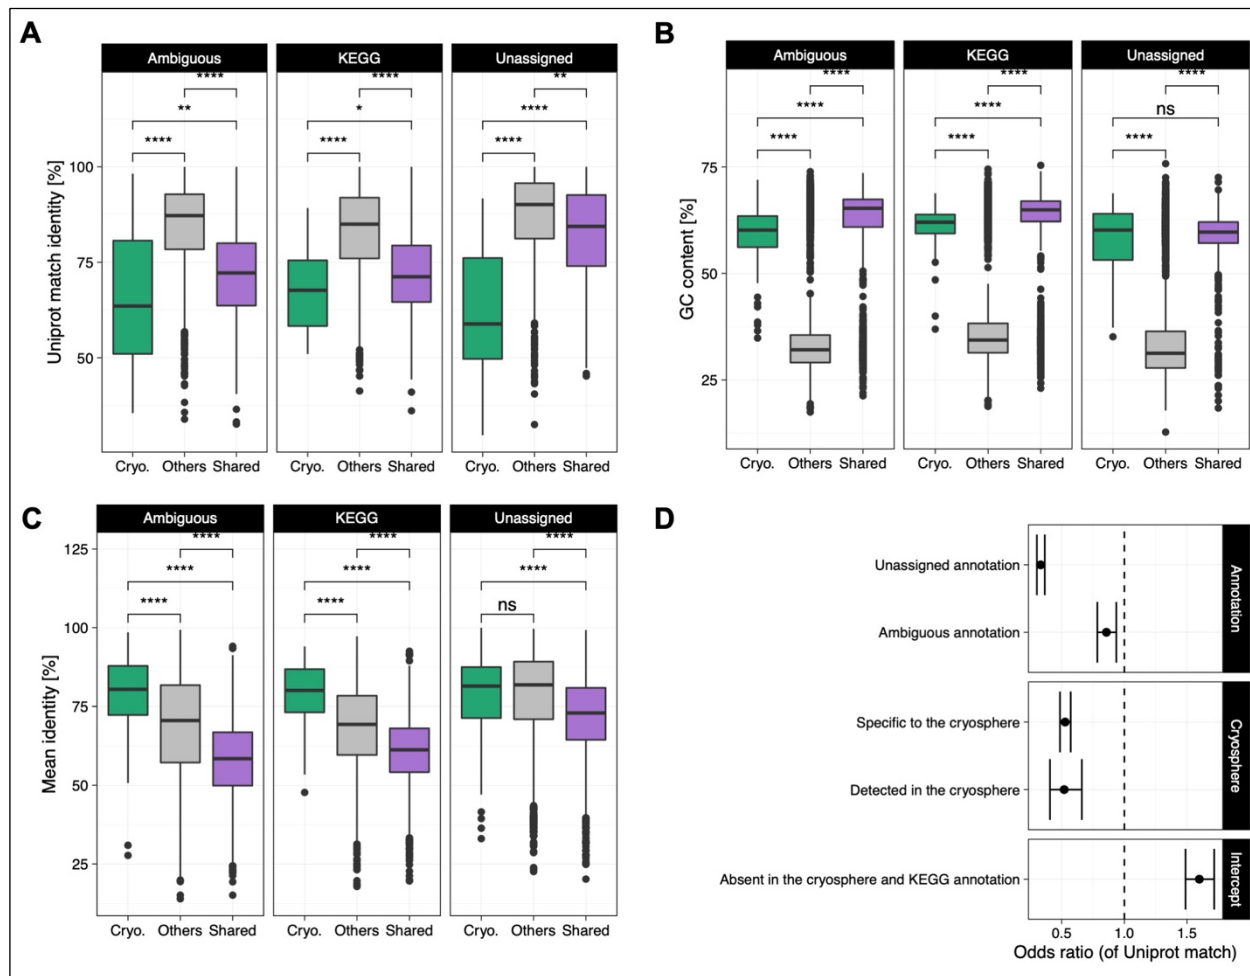

53  
 54 **Supplementary Figure 4.** A) Boxplots indicate the overall identity percentage for representative  
 55 sequences for each of the gene clusters that matched with UniProt sequences. The figures  
 56 demonstrate these values for the Cryosphere-only genes, non-cryosphere (Othersx) and those  
 57 'shared' between the two habitats. B) The GC content % of all the genes within each cluster is  
 58 shown. C) The pairwise identity of all sequences within each cluster is represented on the boxplots.  
 59 D) Odds-ratio estimations of the UniProt matches with respect to the annotation level, and the  
 60 presence/or not in the cryospheric metagenomes. Two-sided Wilcoxon tests were performed to  
 61 assess significance in panels A, B and C; the Holm method was used to correct for multiple testing  
 62 (\*\*\*\*: 0-0.0001, \*\*\*: 0.0001-0.001, \*\*: 0.001-0.01, \*: 0.01-0.05). Boxplots depict the median and  
 63 the 25<sup>th</sup> and 75<sup>th</sup> quartiles, whiskers extend to values within 1.5 times the interquartile range, and  
 64 the remaining points are outliers. Sample sizes are listed in Table 1. The exact p-values and test  
 65 statistics are available in the Supplementary Table 8.

| Dataset | Accuracy [%] | Precision [%] | Recall [%] | AUC [%]    |
|---------|--------------|---------------|------------|------------|
| PP1     | 96.04±1.93   | 99.99±0.05    | 92.08±3.86 | 99.93±0.02 |
| PP2     | 97.95±1.35   | 99.93±0.14    | 95.96±2.71 | 99.93±0.02 |

66 **Supplementary Table 1.** Cryospheric bacterial communities' logistic classification models  
67 performance summary for each primer pair dataset.  
68

| Dataset | Group 1     | Group 2      | Sorensen's index  |        |                   | β-MNTD            |        |                   |
|---------|-------------|--------------|-------------------|--------|-------------------|-------------------|--------|-------------------|
|         |             |              | Corrected p-value | r      | Median difference | Corrected p-value | r      | Median difference |
| PP1     | Cryo-Cryo   | Cryo-Others  | < 2e-16           | 0.185  | 0.038             | < 2e-16           | 0.0821 | 0.012             |
|         | Cryo-Cryo   | Other-Others | < 2e-16           | 0.140  | 0.042             | < 2e-16           | 0.0639 | 0.01              |
|         | Cryo-Others | Other-Others | 7.6e-13           | 0.0174 | 0.004             | < 2e-16           | 0.144  | 0.022             |
| PP2     | Cryo-Cryo   | Cryo-Others  | < 2e-16           | 0.238  | 0.046             | <2e-16            | 0.183  | 0.032             |
|         | Cryo-Cryo   | Other-Others | < 2e-16           | 0.263  | 0.057             | <2e-16            | 0.125  | 0.028             |
|         | Cryo-Others | Other-Others | < 2e-16           | 0.0501 | 0.011             | <2e-16            | 0.0503 | 0.004             |

69 **Supplementary Table 2.** β-diversity phylogenetics (Sorensen's Index and β-MNTD) computed  
70 for 50 iterations randomly drawing 50 cryospheric and 50 non-cryospheric samples (sample sizes  
71 for each group:  $N_{PP1-Sor} = 83583$ ,  $N_{PP2-Sor} = 98142$ ,  $N_{PP1-MNTD} = 77893$ ,  $N_{PP2-MNTD}=91398$ ). For  
72 both datasets and primer pairs, the Kruskal-Wallis tests were highly significant (p-value < 2.2e-  
73 16), post-hoc two-sided Wilcoxon tests results are reported in the table, the p-value was corrected  
74 using the Holm method. The effect size was computed as r with the *statix* R package.

|                     |                           | <b><math>\alpha</math>-MPD (model p-value: &lt; 2.2e-16)</b>  |                |                |
|---------------------|---------------------------|---------------------------------------------------------------|----------------|----------------|
|                     |                           | <b>Estimate</b>                                               | <b>p-value</b> | <b>t-value</b> |
| <b>Coefficients</b> | <b>Intercept</b>          | 0.389±0.014                                                   | 28.667         | <2e-16         |
|                     | <b>Cryosphere</b>         | 0.077±0.005                                                   | 13.933         | <2e-16         |
|                     | <b>log(SR)</b>            | 0.062±0.004                                                   | 15.973         | <2e-16         |
|                     | <b>DatasetPP2</b>         | -0.038±0.004                                                  | -9.129         | <2e-16         |
| <b>Model</b>        | <b>Adj. R<sup>2</sup></b> | 0.108                                                         |                |                |
|                     | <b>df</b>                 | 4240                                                          |                |                |
|                     |                           | <b><math>\alpha</math>-MNTD (model p-value: &lt; 2.2e-16)</b> |                |                |
|                     |                           | <b>Estimate</b>                                               | <b>t-value</b> | <b>p-value</b> |
| <b>Coefficients</b> | <b>Intercept</b>          | 0.307±0.006                                                   | 48.933         | <2e-16         |
|                     | <b>Cryosphere</b>         | 0.015±0.003                                                   | 5.734          | 1.05e-08       |
|                     | <b>log(SR)</b>            | -0.053±0.002                                                  | -29.399        | <2e-16         |
|                     | <b>DatasetPP2</b>         | 0.020±0.002                                                   | 10.302         | <2e-16         |
| <b>Model</b>        | <b>Adj. R<sup>2</sup></b> | 0.191                                                         |                |                |
|                     | <b>df</b>                 | 4240                                                          |                |                |
|                     |                           | <b><math>\alpha</math>-PD (model p-value: &lt; 2.2e-16)</b>   |                |                |
|                     |                           | <b>Estimate</b>                                               | <b>t-value</b> | <b>p-value</b> |
| <b>Coefficients</b> | <b>Intercept</b>          | 0.450±0.047                                                   | 9.483          | <2e-16         |
|                     | <b>Cryosphere</b>         | 0.532±0.049                                                   | 10.955         | <2e-16         |
|                     | <b>SR</b>                 | 0.110±0.001                                                   | 89.696         | <2e-16         |
|                     | <b>DatasetPP2</b>         | 0.398±0.037                                                   | 10.887         | <2e-16         |
| <b>Model</b>        | <b>Adj. R<sup>2</sup></b> | 0.664                                                         |                |                |
|                     | <b>df</b>                 | 4240                                                          |                |                |

75 **Supplementary Table 3.**  $\alpha$ -diversity phylogenetics (MPD: mean phylogenetic distance, MNTD:  
76 mean nearest taxon distance; PD: phylogenetic diversity) linear models testing the influence of the  
77 cryosphere on the different metrics, with the species richness (SR, log-transformed) and the dataset  
78 as fixed effects (Intercept = non-cryospheric, and PP1).



| <b>PERMANOVA</b>            | <b>DF</b> | <b>Sum of squares</b> | <b>r<sup>2</sup></b> | <b>f-value</b> | <b>p-value</b> |
|-----------------------------|-----------|-----------------------|----------------------|----------------|----------------|
| Ecosystem                   | 3         | 55.774                | 0.18319              | 52.702         | < 0.001        |
| Dataset                     | 1         | 5.633                 | 0.01850              | 15.969         | < 0.001        |
| Residual                    | 689       | 243.055               | 0.79831              |                |                |
| Total                       | 693       | 304.462               | 1.00000              |                |                |
| <b>Snow/Ice – Terr.</b>     | <b>DF</b> | <b>Sum of squares</b> | <b>r<sup>2</sup></b> | <b>f-value</b> | <b>p-value</b> |
| Ecosystem                   | 1         | 18.859                | 0.11779              | 54.36          | < 0.001        |
| Dataset                     | 1         | 4.906                 | 0.03064              | 14.14          | < 0.001        |
| Residual                    | 393       | 136.340               | 0.85157              |                |                |
| Total                       | 395       | 160.105               | 1.00000              |                |                |
| <b>Snow/Ice – Marine</b>    | <b>DF</b> | <b>Sum of squares</b> | <b>r<sup>2</sup></b> | <b>f-value</b> | <b>p-value</b> |
| Ecosystem                   | 1         | 23.280                | 0.15758              | 66.918         | < 0.001        |
| Dataset                     | 1         | 4.087                 | 0.02767              | 11.749         | < 0.001        |
| Residual                    | 346       | 120.370               | 0.81476              |                |                |
| Total                       | 348       | 147.737               | 1.00000              |                |                |
| <b>Snow/Ice – Fresh.</b>    | <b>DF</b> | <b>Sum of squares</b> | <b>r<sup>2</sup></b> | <b>f-value</b> | <b>p-value</b> |
| Ecosystem                   | 1         | 10.991                | 0.06768              | 28.6254        | < 0.001        |
| Dataset                     | 1         | 3.195                 | 0.01967              | 8.3202         | < 0.001        |
| Residual                    | 386       | 148.211               | 0.91265              |                |                |
| Total                       | 388       | 162.397               | 1.00000              |                |                |
| <b>Marine – Terr.</b>       | <b>DF</b> | <b>Sum of squares</b> | <b>r<sup>2</sup></b> | <b>f-value</b> | <b>p-value</b> |
| Ecosystem                   | 1         | 25.402                | 0.20705              | 85.019         | < 0.001        |
| Dataset                     | 1         | 7.052                 | 0.05748              | 23.604         | < 0.001        |
| Residual                    | 302       | 90.230                | 0.73547              |                |                |
| Total                       | 304       | 122.684               | 1.00000              |                |                |
| <b>Marine – Fresh.</b>      | <b>DF</b> | <b>Sum of squares</b> | <b>r<sup>2</sup></b> | <b>f-value</b> | <b>p-value</b> |
| Ecosystem                   | 1         | 18.464                | 0.14665              | 53.295         | < 0.001        |
| Dataset                     | 1         | 5.240                 | 0.04162              | 15.125         | < 0.001        |
| Residual                    | 295       | 102.202               | 0.81173              |                |                |
| Total                       | 297       | 125.906               | 1.00000              |                |                |
| <b>Terrestrial - Fresh.</b> | <b>DF</b> | <b>Sum of squares</b> | <b>r<sup>2</sup></b> | <b>f-value</b> | <b>p-value</b> |
| Ecosystem                   | 1         | 16.200                | 0.11536              | 47.332         | < 0.001        |
| Dataset                     | 1         | 7.175                 | 0.05109              | 20.963         | < 0.001        |
| Residual                    | 342       | 117.056               | 0.83355              |                |                |
| Total                       | 344       | 140.431               | 1.00000              |                |                |

79 **Supplementary Table 4.** Model summaries for the PERMANOVA and all pairwise.adonis  
80 comparisons of cryospheric ecosystem types.  
81

| <b>WTS model</b> | <b>Test statistic</b> | <b>df</b> | <b>p-value WTPS</b> |                 |
|------------------|-----------------------|-----------|---------------------|-----------------|
| Ecosystem        | 112.0236              | 3         | 0                   |                 |
| Interaction      | 103.1681              | 4         | 0                   |                 |
| <b>Ecosystem</b> | <b>Datastet</b>       | <b>N</b>  | <b>Mean</b>         | <b>Variance</b> |
| Freshwater       | PP1                   | 29        | 3.72                | 0.26            |
| Freshwater       | PP2                   | 140       | 2.84                | 0.48            |
| Ice/Snow         | PP1                   | 92        | 2.76                | 0.69            |
| Ice/Snow         | PP2                   | 128       | 2.93                | 0.68            |
| Marine           | PP1                   | 88        | 3.03                | 0.18            |
| Marine           | PP2                   | 41        | 3.71                | 0.41            |
| Terrestrial      | PP1                   | 92        | 3.69                | 0.80            |
| Terrestrial      | PP2                   | 84        | 3.64                | 0.28            |

82 **Supplementary Table 5.** Shannon’s index  $H \alpha$ -diversity (calculated at the genus taxonomic level)  
83 Wald-Type Statistic (WTS) summary. This test was chosen as a non-parametric alternative to  
84 ANOVA for non-normally distributed data. “Interaction” represents the interaction between the  
85 Ecosystem and Dataset parameters, “Ecosystem” the fixed effect of the ecosystem type. The  
86 computed means weighted by sample sizes are 2.987, 2.856, 3.245, and 3.669 for freshwater,  
87 snow/ice, marine and terrestrial, respectively.  
88

| <b>Metric</b>            | <b>Median</b> <sub>Others (n=265)</sub> | <b>Median</b> <sub>Cryo (n=197)</sub> | <b>Median</b> <sub>Under.(n=198)</sub> |
|--------------------------|-----------------------------------------|---------------------------------------|----------------------------------------|
| GC content [%]           | 48.7                                    | 57.5 (corr. p = 0.0011)               | 56.1 (corr. p = 0.0086)                |
| Genome size [mbp]        | 3.97                                    | 4.19 (corr. p = 0.17)                 | 4.06 (corr. p = 0.28)                  |
| Growth doubling time [d] | 4.48                                    | 4.12 (corr. p = 0.87)                 | 4.55 (corr. p = 0.51)                  |
| Codon usage bias [CUBHE] | 0.627                                   | 0.627 (corr. p = 1)                   | 0.623 (corr. p = 1)                    |
| Consistency [HE]         | 0.527                                   | 0.519 (corr. p = 0.84)                | 0.529 (corr. p = 0.25)                 |
| Codon pair bias [CPB]    | -0.375                                  | -0.370 (corr. p = 0.92)               | -0.380 (corr. p = 0.74)                |

89 **Supplementary Table 6.** RefSeq genomic properties summary. Corrected p-values were  
90 computed using two-sided Wilcoxon tests implemented in the *compare\_means* function of the  
91 *ggpubr* R package, comparing the cryospheric and underrepresented genera against the others.  
92

| <b>Dataset</b> | <b>Study ID</b> | <b>Sample n.</b> | <b>Ecosystem type</b> | <b>Description</b>                                                |
|----------------|-----------------|------------------|-----------------------|-------------------------------------------------------------------|
| <i>PP1</i>     | Bergk2019       | 12               | Ice/Snow              | Snow samples, Svalbard                                            |
| <i>PP1</i>     | NOMIS           | 10               | Freshwater            | Glacier-fed stream sediment samples, Russia and New Zealand       |
| <i>PP1</i>     | PRJDB9246       | 11               | Freshwater            | Microbial mat and water, Antarctica                               |
| <i>PP1</i>     | PRJEB12640      | 41               | Terrestrial           | Soil chronosequence samples, Svalbard                             |
| <i>PP1</i>     | PRJEB26163      | 62               | Marine                | Marine water, Arctic Ocean                                        |
| <i>PP1</i>     | PRJEB29215      | 32               | Ice/Snow              | Snow samples, Antarctica                                          |
| <i>PP1</i>     | PRJEB31938      | 26               | Marine                | Sea ice, snow, water and sediment, Greenland and the Arctic Ocean |
| <i>PP1</i>     | PRJEB40467      | 18               | Terrestrial           | Alpine permafrost, Italy                                          |
| <i>PP1</i>     | PRJNA296475     | 3                | Ice/Snow              | Cryoconite hole, Svalbard                                         |
| <i>PP1</i>     | PRJNA320505     | 1                | Ice/Snow              | Cryoconite hole, Antarctica                                       |
| <i>PP1</i>     | PRJNA380676     | 1                | Terrestrial           | Arctic rock, Svalbard                                             |
| <i>PP1</i>     | PRJNA418054     | 32               | Terrestrial           | Permafrost, Alaska                                                |
| <i>PP1</i>     | PRJNA430179     | 11               | Ice/Snow              | Glacier Ice/snow, Spain                                           |
| <i>PP1</i>     | PRJNA436954     | 8                | Freshwater            | High-arctic microbial mat                                         |
| <i>PP1</i>     | PRJNA529498     | 33               | Ice/Snow              | Cryoconite hole, Antarctica                                       |
| <i>PP2</i>     | PRJEB11496      | 24               | Marine                | Marine sediment, Antarctica                                       |
| <i>PP2</i>     | PRJEB23054      | 59               | Terrestrial           | Permafrost, Alaska                                                |
| <i>PP2</i>     | PRJNA244335     | 31               | Freshwater            | Sediment and water from subglacial lake, Antarctica               |
| <i>PP2</i>     | PRJNA255432     | 70               | Freshwater            | Arctic lake, Canada                                               |
| <i>PP2</i>     | PRJNA278982     | 4                | Marine                | Ice-shelf water cavity, Antarctica                                |
| <i>PP2</i>     | PRJNA321351     | 9                | Freshwater            | Arctic lake, Greenland                                            |
| <i>PP2</i>     | PRJNA324626     | 9                | Terrestrial           | Frozen soil, China                                                |
| <i>PP2</i>     | PRJNA430887     | 26               | Ice/Snow              | Glacier ice and weather crust, USA                                |
| <i>PP2</i>     | PRJNA431087     | 1                | Terrestrial           | Microbial mat, Antarctica                                         |
| <i>PP2</i>     | PRJNA432743     | 7                | Freshwater            | Subglacial aquifer brine, Antarctica                              |
| <i>PP2</i>     | PRJNA471245     | 51               | Ice/Snow              | Water, ice, soil, sediment and microbial mat, Antarctica          |
| <i>PP2</i>     | PRJNA480849     | 1                | Ice/Snow              | Cryoconite hole, Antarctica                                       |

|            |             |    |                         |                                       |
|------------|-------------|----|-------------------------|---------------------------------------|
| <i>PP2</i> | PRJNA554442 | 11 | Terrestrial             | Permafrost, Alaska                    |
| <i>PP2</i> | PRJNA593264 | 13 | Marine                  | Water, sediments and snow, Antarctica |
| <i>PP2</i> | PRJNA629965 | 6  | Freshwater,<br>Ice/Snow | Snow and glacier melt                 |
| <i>PP2</i> | PRJNA744712 | 72 | Ice/Snow                | Cryoconite hole, Antarctica           |

93 **Supplementary Table 7.** Summary of the cryospheric samples included in the two 16s rRNA  
94 amplicon datasets (primer pair 1 = PP1, and primer pair 2 = PP2).

| Metric                    | Group      | Comparison    | Corr. p-value |
|---------------------------|------------|---------------|---------------|
| Uniprot identity [%]      | KEGG       | Cryo.-Shared  | 2.9e-2        |
|                           |            | Cryo.-Others  | 5.7e-10       |
|                           |            | Shared-Others | 1.2e-101      |
|                           | Ambiguous  | Cryo.-Shared  | 4.2e-3        |
|                           |            | Cryo.-Others  | 2.6e-12       |
|                           |            | Shared-Others | 2.7e-87       |
|                           | Unassigned | Cryo.-Shared  | 2.6e-7        |
|                           |            | Cryo.-Others  | 2.1e-13       |
|                           |            | Shared-Others | 2.6e-3        |
| Mean GC [%]               | KEGG       | Cryo.-Shared  | 2.7 e-5       |
|                           |            | Cryo.-Others  | 1.1e-17       |
|                           |            | Shared-Others | 5.50e-292     |
|                           | Ambiguous  | Cryo.-Shared  | 7.8e-9        |
|                           |            | Cryo.-Others  | 1.1e-50       |
|                           |            | Shared-Others | 4.20e-297     |
|                           | Unassigned | Cryo.-Shared  | 8.6e-1        |
|                           |            | Cryo.-Others  | 1.1e-68       |
|                           |            | Shared-Others | 0             |
| Mean Cluster Identity [%] | KEGG       | Cryo.-Shared  | 4.3e-19       |
|                           |            | Cryo.-Others  | 2.1e-7        |
|                           |            | Shared-Others | 3.9e-81       |
|                           | Ambiguous  | Cryo.-Shared  | 3e-39         |
|                           |            | Cryo.-Others  | 1.9e-11       |
|                           |            | Shared-Others | 3.9e-78       |
|                           | Unassigned | Cryo.-Shared  | 8.8e-12       |
|                           |            | Cryo.-Others  | 5.4e-1        |
|                           |            | Shared-Others | 5.4e-63       |

95 **Supplementary Table 8.** Unassigned functional clusters exact p-values for the pairwise two-sided  
96 Wilcoxon tests. Corrected p-values were adjusted using the Holm method. Sample sizes are listed  
97 in Table 1.
